# Supplementary material
Source: Springer Nature journal article supplement (https://www.springermedizin.de/resource/supplementary/12889_2012_5359_MOESM3_ESM.pdf/9495116)

## Intervention activities

### Individual level:

- Three participatory skill building workshops addressing calcium intake and physical activity
- Tailored resources
- Calcium intake feedback

### Environmental level:

- Activities at the whole workplaces level
- Resource distribution
  - Nationwide media campaign

## Intervention output

- Increase knowledge about bone health and osteoporosis prevention and the influence of modifiable risk factors
- Increase self-efficacy to increase calcium intake
- Increase self-efficacy to increase physical activity

## Intervention outcome

- Increase calcium intake
- Increase level of physical activity

## Intervention impact

- Improve bone health
- Decrease risks of osteoporosis

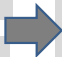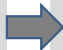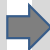

Supplement: MOESM3 [file 9495116]
